Postoperative Delirium after Dexmedetomidine *versus* Propofol Sedation in Healthy Older Adults Undergoing Orthopedic Lower Limb Surgery with Spinal Anesthesia: A Randomized Controlled Trial: Erratum

In figure 1 of the Online First article, “intention-to-treat analysis” in the bottom two boxes of the flowchart should read “per-protocol analysis.” The corrected figure appears below.

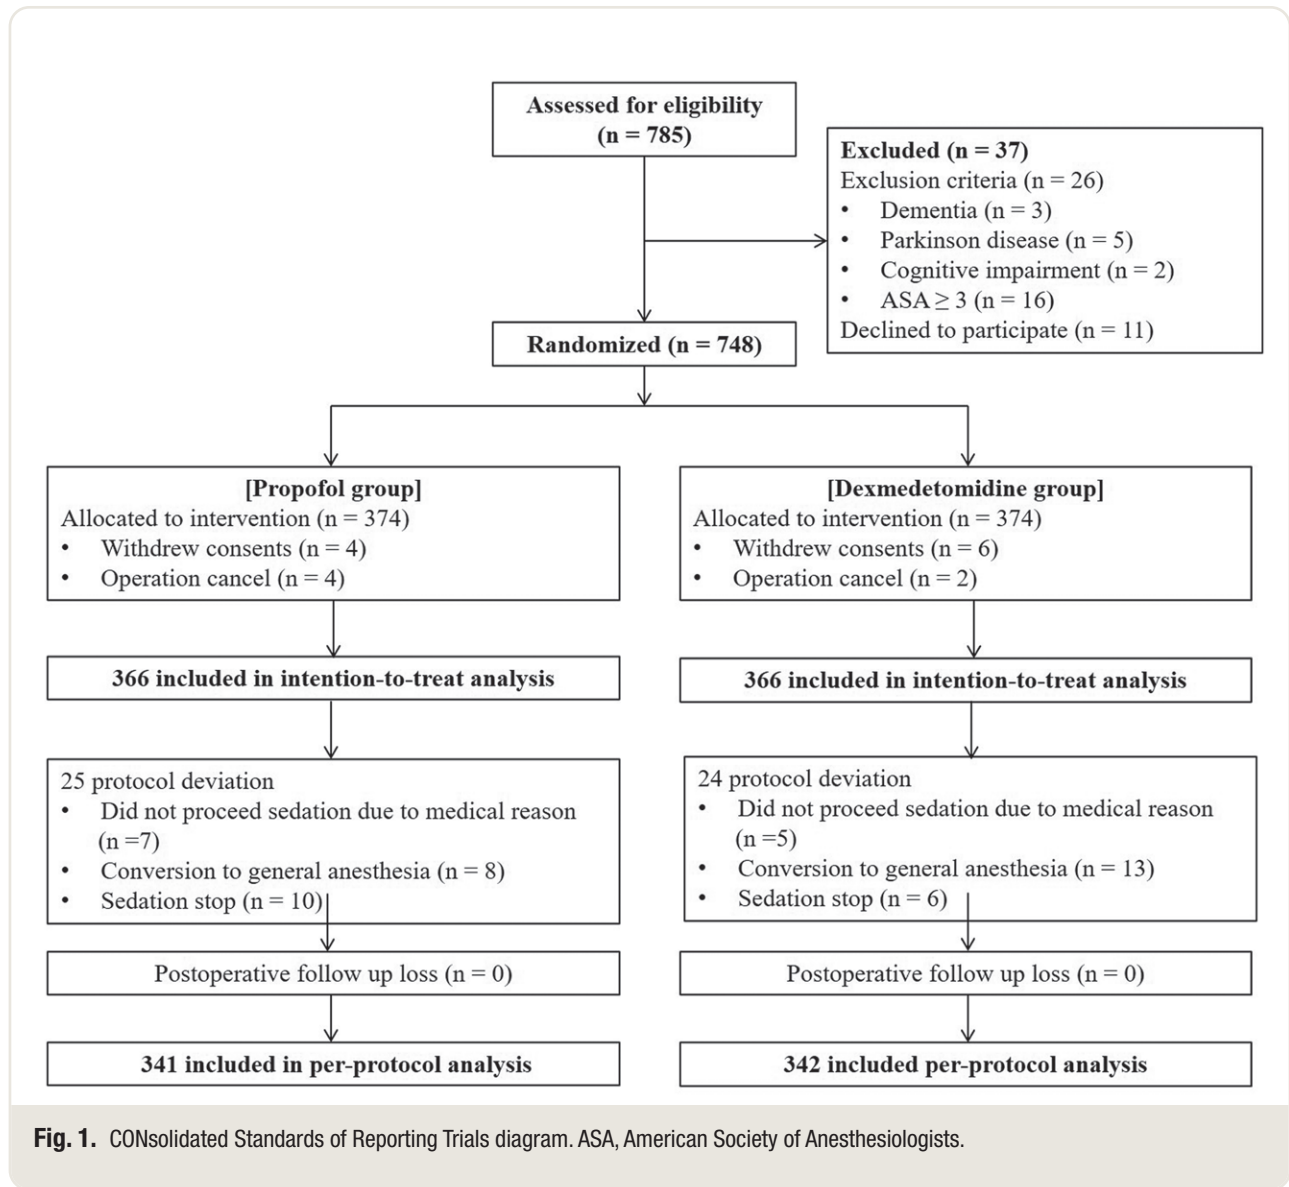

Downloaded from <http://esa2.silverchair.com/anesthesiology/article-pdf/138/4/456/683327/20230400-0-00028.pdf> by guest on 16 April 2024

**Fig. 1.** CONSORT Standards of Reporting Trials diagram. ASA, American Society of Anesthesiologists.

The authors regret this error. The online version and PDF of the article have been corrected.

DOI: 10.1097/ALN.0000000000004488

**Reference**

Shin H-J, Nam SW, Kim H, Yim S, Han S-H, Hwang J-W, Do S-H, Na H-S: Postoperative delirium after dexmedetomidine *versus* propofol sedation in healthy older adults undergoing orthopedic lower limb surgery with spinal anesthesia: A randomized controlled trial. *ANESTHESIOLOGY* 2023; 138:164–71
